# Supplementary material
Source: publisher figshare collection journal article supplement (https://frontiersin.figshare.com/ndownloader/files/28575408)
Supplement: Supplementary file 1 [file 28575408]

## Supplementary Material Figure 1 Instructions

1. Open SM\_Figure\_1.html in your web browser.
2. Single-click on a species' name (e.g., Risso's dolphin) in the scroll-down list on the right to toggle it on/off. When a species is 'on', the chart will display that species (with a dark border around the node) and the other species that it has been seen with in mixed-species groups, i.e., its partner species.

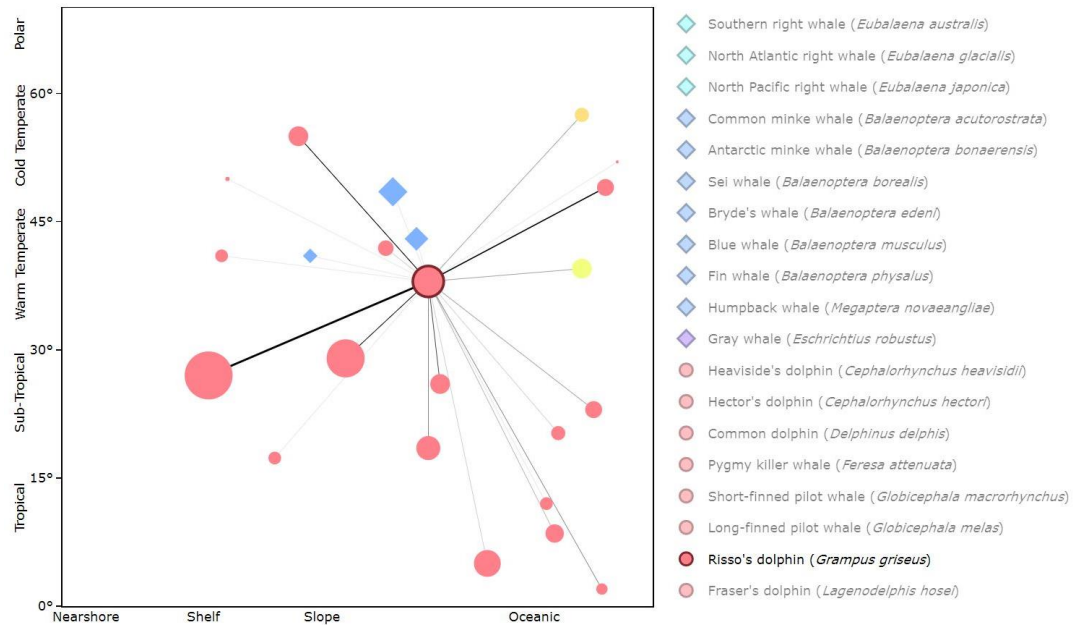

3. Hover the mouse over a node and a box will appear with the species name, the number of partner species, and the number of studies reporting it in mixed-species groups.

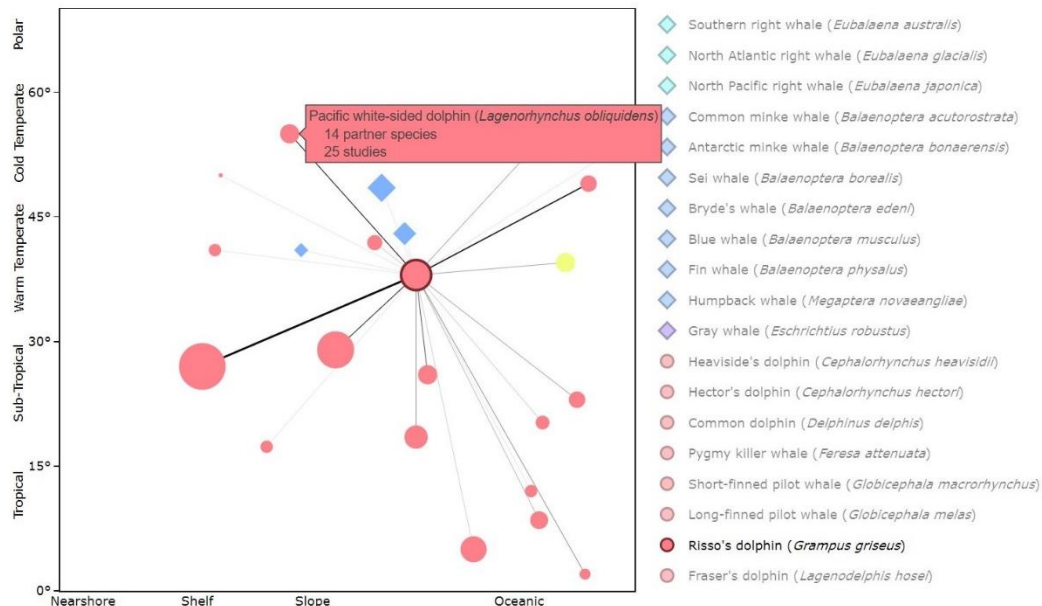

Hover the mouse over the centre of an edge and a box will appear with the two species in that pair and the number of studies reporting that pair in mixed-species groups.

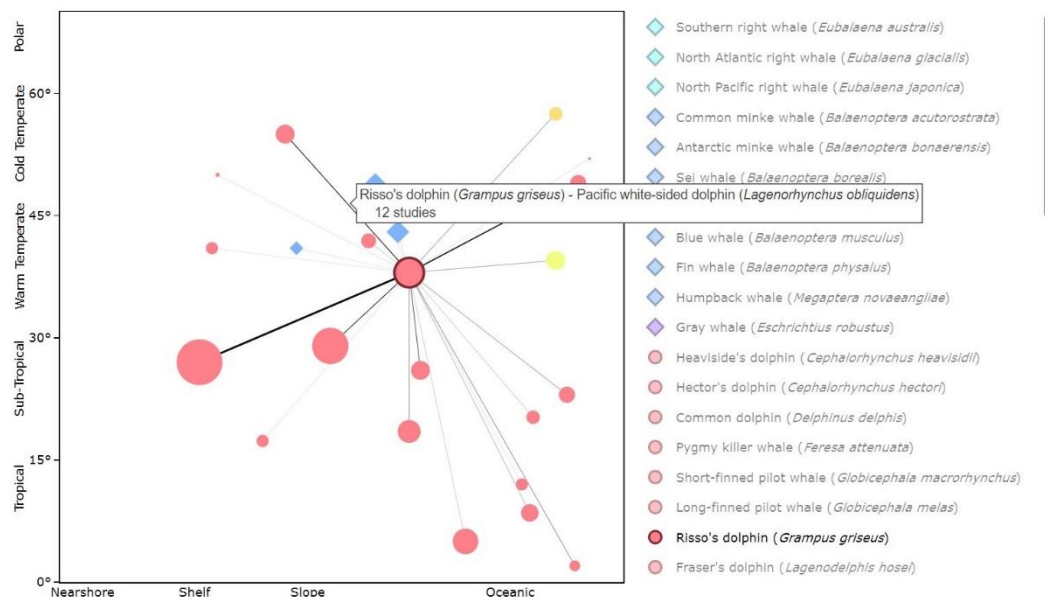

4. Double-click on a species name that is 'off' in the scroll-down list and the chart will display all species and all species pairs.

5. Double-click on a species name that is 'on' in the scroll-down list and the chart will display only that species and its partner species.
